# Supplementary material for: The Effects of Ag Nanoislands on the Volatile Threshold-Switching Behaviors of Au/Ag/HfO2/Ag Nanoislands/Au Devices
Source: Hindawi journal article supplement (doi:10.1155/2023/6675683), 2023-05-06
Supplement: f1 [file 6675683.f1.docx]

Supplementary Information

for

**The effects of Ag nano-islands on the volatile threshold switching behaviors of Au/Ag/HfO2/Ag nano-islands/Au devices**

Fanlin Long1, Yichuan Zhang1, Zhaozhu Qu1, Peiwen Lv2, Baolin Zhang1*.

1. Key Laboratory of New Processing Technology for Nonferrous Metal & Materials, Ministry of Education, Guangxi Key Laboratory of Optical and Electronic Materials and Devices, College of Materials Science and Engineering, Guilin University of Technology, Jian Gan Road 12, Guilin 541004, China.

2. Fujian Institute of Research on the Structure of Matter, Chinese Academy of Sciences, Fuzhou 350000, China.

***For correspondence:**

**Baolin Zhang (PhD),**

Key Laboratory of New Processing Technology for Nonferrous Metal & Materials, Ministry of Education, Guangxi Key Laboratory of Optical and Electronic Materials and Devices, College of Materials Science and Engineering, Guilin University of Technology. Guilin 541004, China., Email: [zhangbaolin@glut.edu.cn](mailto:zhangbaolin@glut.edu.cn); [baolinzhang@ymail.com](mailto:baolinzhang@ymail.com)


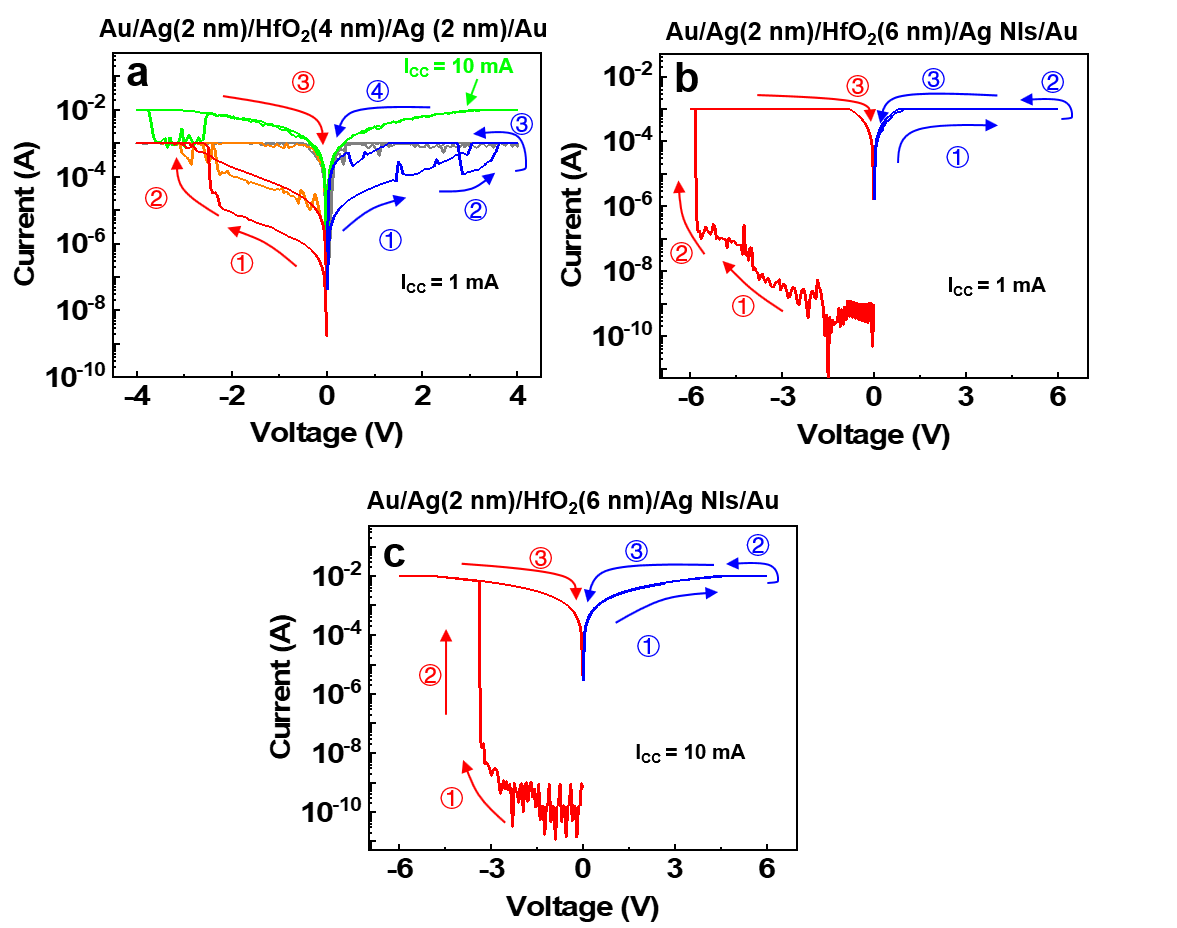


**Figure S1.** (a) The I-V curves of the Au/Ag(2 nm)/HfO2(4 nm)/Ag (2 nm)/Au device under the compliance currents of 1 mA (red and blue curves) and 10 mA(green curves). (b) The I-V curves of the Au/Ag(2 nm)/HfO2(6 nm)/Ag NIs/Au device under the compliance currents of 1 mA. (c) The I-V curves of the Au/Ag(2 nm)/HfO2(6 nm)/Ag NIs/Au device under the compliance currents of 10 mA.


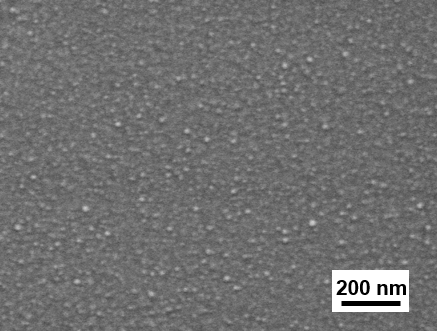


**Figure S2.** The SEM image of the Ag film prepared by electron beam evaporation deposition.
